# Supplementary material for: Cis-regulatory analysis of Onecut1 expression in fate-restricted retinal progenitor cells
Source: PubMed Central journal article supplement (PMC7082998; doi:10.1186/s13064-020-00142-w), 2020-03-19
Supplement: 13064_2020_142_MOESM2_ESM.pdf [file 13064_2020_142_MOESM2_ESM.pdf]

| <b>Enhancer</b> | <b>Genomic Coordinates</b> |
|-----------------|----------------------------|
| <b>ECR1</b>     | chr10: 8663469-8664114     |
| <b>ACR1</b>     | chr10: 8385494-8386148     |
| <b>ECR2</b>     | chr10: 8655229-8657051     |
| <b>ACR2</b>     | chr10: 8384185-8385075     |
| <b>ECR_X</b>    | chr10: 8650489-8651719     |
| <b>ACR3</b>     | chr10: 8375625-8376231     |
| <b>ACR4</b>     | chr10: 8514487-8515384     |
| <b>ECR5</b>     | chr10: 8636448-8636927     |
| <b>ACR5</b>     | chr10: 8512198-8513015     |
| <b>5adj</b>     | chr10: 8637057-8637759     |
| <b>ECR6</b>     | chr10: 8635344-8635535     |
| <b>ACR6</b>     | chr10: 8492309-8492485     |
| <b>ECR7</b>     | chr10: 8634455-8634704     |
| <b>ACR7</b>     | chr10: 8450103-8450313     |
| <b>ECR8</b>     | chr10: 8632688-8633007     |
| <b>ACR8</b>     | chr10: 8394607-8395238     |
| <b>ECR9</b>     | chr9:74846723-74847170     |
| <b>ACR9</b>     | chr10: 8393675-8394030     |
| <b>ECR10</b>    | chr10: 8631067-8631367     |
| <b>ACR10.A</b>  | chr10:8675208-8675805      |
| <b>ACR10.B</b>  | chr10:8675786-8676296      |
| <b>ACR10.C</b>  | chr10:8676249-8676699      |
| <b>ACR10.D</b>  | chr10:8676652-8677308      |
| <b>ECR11</b>    | chr10: 8625901-8626415     |
| <b>ACR11</b>    | chr10: 8642720-8643265     |
| <b>11adj</b>    | chr10: 8624685-8625065     |
| <b>ECR_A</b>    | chr10: 8622011-8622605     |
| <b>ECR12</b>    | chr10: 8616893-8617477     |
| <b>12adj</b>    | chr10: 8615429-8616540     |
| <b>ECR14</b>    | chr10: 8612329-8612808     |
| <b>14adj</b>    | chr10: 8613306-8615161     |
| <b>ECR15</b>    | chr10: 8607507-8609556     |
| <b>ECR17</b>    | chr10: 8604723-8605057     |
| <b>ECR18</b>    | chr10: 8602677-8603712     |
| <b>ECR19</b>    | chr10: 8599411-8599875     |
| <b>ECR20</b>    | chr10: 8595596-8596293     |
| <b>ECR21</b>    | chr10: 8594202-8594551     |
| <b>ECR22</b>    | chr10: 8593808-8594297     |
| <b>ECR24</b>    | chr10: 8584888-8585254     |
| <b>ECR25</b>    | chr10: 8584888-8585254     |
| <b>ECR26</b>    | chr10: 8576532-8577086     |
| <b>ECR27</b>    | chr10: 8576893-8577385     |
| <b>ECR28</b>    | chr10: 8577272-8577677     |
| <b>ECR29</b>    | chr10: 8569146-8569350     |

|              |                        |
|--------------|------------------------|
| <b>ECR30</b> | chr10: 8567124-8567852 |
| <b>ECR31</b> | chr10: 8563261-8563496 |
| <b>ECR32</b> | chr10: 8563261-8563496 |
| <b>ECR33</b> | chr10: 8552799-8553199 |
| <b>ECR34</b> | chr10: 8552380-8552892 |
| <b>ECR35</b> | chr10: 8545908-8546480 |
| <b>ECR36</b> | chr10: 8542616-8545100 |
| <b>ECR37</b> | chr10: 8539165-8539457 |
| <b>ECR38</b> | chr10: 8535862-8536250 |
| <b>ECR39</b> | chr10: 8535401-8535717 |
| <b>ECR40</b> | chr10: 8531924-8532238 |
| <b>ECR41</b> | chr10: 8531318-8531625 |
| <b>ECR42</b> | chr10: 8528440-8528938 |
| <b>ECR43</b> | chr10: 8526952-8526952 |
| <b>ECR44</b> | chr10: 8521966-8522213 |
| <b>ECR45</b> | chr10: 8521266-8522058 |
| <b>ECR46</b> | chr10: 8515926-8516305 |
| <b>ECR47</b> | chr10: 8507915-8508786 |
| <b>ECR48</b> | chr10: 8505975-8506397 |
| <b>ECR49</b> | chr10: 8501851-8502327 |
| <b>49adj</b> | chr10: 8502221-8502639 |
| <b>ECR50</b> | chr10: 8500530-8501106 |
| <b>ECR51</b> | chr10: 8495478-8496218 |
| <b>ECR52</b> | chr10: 8490472-8490869 |
| <b>ECR53</b> | chr10: 8489091-8489919 |
| <b>ECR54</b> | chr10: 8486341-8486607 |
| <b>ECR55</b> | chr10: 8481081-8481361 |
| <b>ECR56</b> | chr10: 8480144-8480410 |
| <b>ECR57</b> | chr10: 8479342-8479641 |
| <b>ECR58</b> | chr10: 8478198-8478383 |
| <b>ECR59</b> | chr10: 8476275-8476779 |
| <b>ECR60</b> | chr10: 8472598-8472844 |
| <b>ECR61</b> | chr10: 8469909-8470514 |
| <b>ECR62</b> | chr10: 8459873-8460361 |
| <b>ECR63</b> | chr10: 8457431-8457602 |
| <b>ECR64</b> | chr10: 8453886-8454273 |
| <b>ECR65</b> | chr10: 8450796-8451312 |
| <b>ECR66</b> | chr10: 8447307-8447542 |
| <b>66adj</b> | chr10: 8446729-8447361 |
| <b>ECR67</b> | chr10: 8444225-8444787 |
| <b>ECR68</b> | chr10: 8442354-8442820 |
| <b>ECR69</b> | chr10: 8436831-8437103 |

|              |                        |
|--------------|------------------------|
| <b>ECR70</b> | chr10: 8432829-8433099 |
| <b>70adj</b> | chr10: 8433359-8433724 |
| <b>ECR71</b> | chr10: 8427766-8428649 |
| <b>ECR72</b> | chr10: 8422264-8422774 |
| <b>ECR73</b> | chr10: 8421785-8422274 |
| <b>ECR74</b> | chr10: 8419319-8420332 |
| <b>ECR75</b> | chr10: 8414515-8414968 |
| <b>ECR76</b> | chr10: 8412870-8413389 |
| <b>ECR77</b> | chr10: 8406698-8407162 |
| <b>ECR78</b> | chr10: 8645415-8645691 |
