# Supplementary material for: Cis-regulatory analysis of Onecut1 expression in fate-restricted retinal progenitor cells
Source: PubMed Central journal article supplement (PMC7082998; doi:10.1186/s13064-020-00142-w), 2020-03-19
Supplement: 13064_2020_142_MOESM7_ESM.pdf [file 13064_2020_142_MOESM7_ESM.pdf]

ECR9\_chick -----  
ECR9\_mouse TTGCACTTCCTGTGGATTAGTGAACAGATCTCTTTATAGACTACATCTGCTCTCTCTT  
ECR9\_human -----

Region 1

ECR9\_chick -----AGGGTAGGGCTCCAGAAAGGTTAAGGCTTTTCAGGCC  
ECR9\_mouse CCACAATCTGTCTACCTAGGGGGAGGGCTGGCGGAAAGGTTAAAGGTTTCTGGTC  
ECR9\_human -----GAAAGGTTAAAGGTTCTCTGGTC  
\*\*\*\*\*

Region 2

ECR9\_chick AAAATCCTCCAACAGAAGCAGGGGTACGCTCGGAGTGAATCTAAGTCTAATGACTG  
ECR9\_mouse GAAATAGCCCAACAGA---AGGGCCCGCCAGAGCTGAAATCTAAGT-CTAATGACCG  
ECR9\_human AAAATAGCCCAACAGA---AGGAGCTGGCCAGAGCTGAAATCTAAGTCTAATGACCG  
\*\*\*\*\*

ECR9\_chick ATGCCCTTACCCCTCCGTCGCTCCAAAGGCGACTGCCCTGGATGAGC---CGGG---  
ECR9\_mouse CTGCCCTTACCTCGCTGTCTCCACAGCCGACCTGCGGCCCGTGGGGCCGGGACC  
ECR9\_human TTGCCCTTACCCCTACTGCTGTCACACTGGCCGACCTGCGGCCGGTGGGCCCGGACT  
\*\*\*\*\*

Region 6

ECR9\_chick -----GCCGGAGAGCATTAACTTTGAACCTTTCACGCTGCGAGGCAGCA  
ECR9\_mouse AGGACAGGACACAATTTCTTCGTTTAACATTTGAACCTC---TCCTATCCGAGGCAGCA  
ECR9\_human GGGAGAGGGCACAAATTTCTGCATTTAACATTTGAACCTC---TCCTATCCGAGGCAGCA  
\*\*\*\*\*

Region 5

Region 4

ECR9\_chick GGCCGTTGTGCGGGGGT-CGCTGACCCCGAGCCCGCTCCCGAGCCCTCAGCTGCCTC  
ECR9\_mouse GGCCGTTTGTCTCGGGTTCGCTGAC-----CCTCGCTCCCCATCAGCTGCCCT  
ECR9\_human GGCCGTTTGTCTCGGGTTCGCTGAC-----CCTGGCTCCCCCATCAGCTGCCCT  
\*\*\*\*\*

Region 3

ECR9\_chick CCGGCCCTAATTGAATGACAGATGGTCAGCGGCGAGAGGGCAGGAGCCGGCCCGCG  
ECR9\_mouse GAAACCTTAATTGAATGACAGATGGTCATTTTCGGGGCCGCAAGAGCTGCGCTGGCCAG  
ECR9\_human GAAACCTTAATTGAATGACAGATGGTCAT-----  
\*\*\*\*\*

ECR9\_chick CCCCAGCACTGCTGCCACGCGCCCGAGGGCCGCTCGGCCGCCACTAAGGAGCGGGG  
ECR9\_mouse TGG-AGGGGCTCAGGCCGAGAAGGCTTGTCTAGGCTCTGCTGCT-----  
ECR9\_human -----

ECR65\_chick TTTCCATGCATCAGCTGCTATTGTATGACCATAACATAATGGGTCTAAGTGCCTACATCA  
ECR65\_mouse -----  
ECR65\_human -----

ECR65\_chick GATGCCTATTATGTGAAATTAATTTTGAACATATGCTGTTGATTATACCATTGTTG  
ECR65\_mouse -----  
ECR65\_human -----

ECR65\_chick TTTTCATGCTAGATTAATCTTCAAGGTTATAATCACATGACACTTATCATTTTAAATAT  
ECR65\_mouse -----  
ECR65\_human -----

Region 1

ECR65\_chick GCCTCTTTAGTTGCAACATATGACAGCTTTTGACTTCTCACCTCTCCTTCTGCATGTGT  
ECR65\_mouse -----TTGTATTGTGT  
ECR65\_human -----TTGTATTGTGT  
\*\*\*\*\*

Region 2

ECR65\_chick GACAGATAAAATTTAATAAATGCTTGTATTATGTAGTTATGCTGTACATGTCACACA  
ECR65\_mouse GACCAATGAGATTATTAATAAATGCTTTTTCATGTTATCCAGGCTGTAGGTGCCACG  
ECR65\_human GACCAATGAGATTATTAATAAATGCTTTTTCATGTTATGTTATGTTAGTTAGGTGCCACA  
\*\*\*\*\*

Region 3/5

ECR65\_chick GGGTGTAGGTTGGCTTGTGTATTTTACCAGAGTACAGTGTGAGCAGGCTTTGTGGT  
ECR65\_mouse GGGTATGGGCGAGCCTCCTGTATTTTATTTCTGGGTGAGTGTGAGCAGGCTTTGTGGAT  
ECR65\_human GGGTATGGGCTGGCTCATGTATTTTATTTCTGGGTGAGTGTGAGCAGGCTTTGTGGAT  
\*\*\*\*\*

Region 4

ECR65\_chick TTGCTAATGAGCTAAATCCCACTAACACCACACACTTAACTGCCAAAAGCCCTTTA  
ECR65\_mouse TTGCTAATGAGCTAAATCCCGTTAGTGCCACACGCCCTGGATGGC--CAGAGATCTTTTA  
ECR65\_human TTGCTAATGAGCTAAATCCCGTTAGTGCCACATGCCCTGGATGC--CAGAGATCTTTTA  
\*\*\*\*\*

ECR65\_chick CACATTCAAACACATACAAAGACTCAGCTGGTCCCTTTGTATAAAAGATTAACTCTTTAT  
ECR65\_mouse AATACATCATTTGCTCACAGAGACTCAGCTGGACTCAGGCAGAGAGATTAACTCCTCAT  
ECR65\_human AATACATCATTTGCTCAGAGACTCAGCTGGGTTGATGAGAGAGATTAACTCCTCAT  
\*\*\*\*\*

ECR65\_chick TCCAATTAAGATGAGCTGGCTGGCTTGGTCCAA-----  
ECR65\_mouse TCCAATTAGCAAAGAGTCCGACTGTTGCATGT-GGCTTGTCTGTAGCCCAACCCGGG  
ECR65\_human TCCAATTAACAGAGATCATACTGTTGAGAGAGGGTGTCTTATGTAGCCCAACCTAG  
\*\*\*\*\*

ECR9 bHLH Site 4

GGCCCTAATTGAATGACAGATGGTCAGC  
AACCTTAATTGAATGACAGATGGTCATT  
AACCTTAATTGAATGACAGATGGTCAT-  
\*\* \*\*\*\*\*

ECR9 bHLH Site 3

CCGCTCCCCAGCCCCTCAGCTGCCTC  
--CCTCGCTCCCCCATCAGCTGCCCT  
--CCTGGCTCCCCCATCAGCTGCCCT  
\*\* \* \*\* \*\*\*\*\*

ECR65 bHLH site

TACAAAGACTCAGCTGGTTCCTT  
CACAGAGACTCAGCTGGACTCAG  
CTCAGAGACTCAGCTGGGTTTCAG  
\*\* \*\*\*\*\*
