# Supplementary material for: Cis-regulatory analysis of Onecut1 expression in fate-restricted retinal progenitor cells
Source: PubMed Central journal article supplement (PMC7082998; doi:10.1186/s13064-020-00142-w), 2020-03-19

**A**

Unscaled (raw) values of ECR65 control conditions

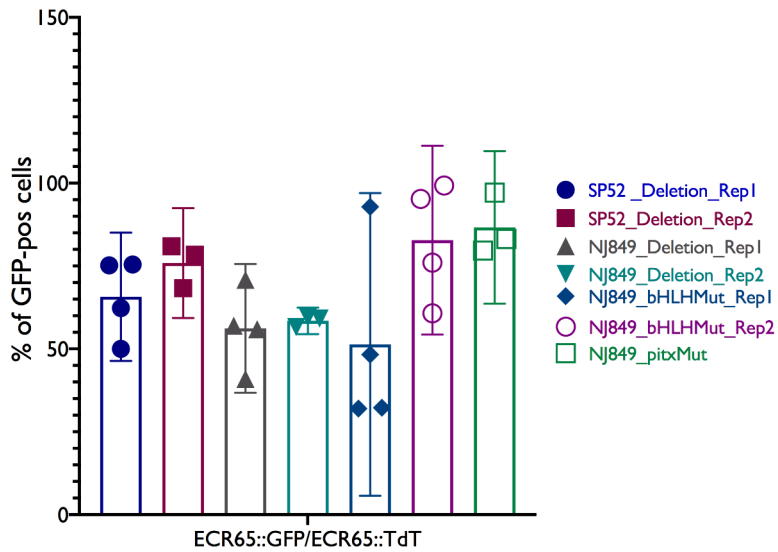**B**

Unscaled (raw) values of ECR65 control conditions

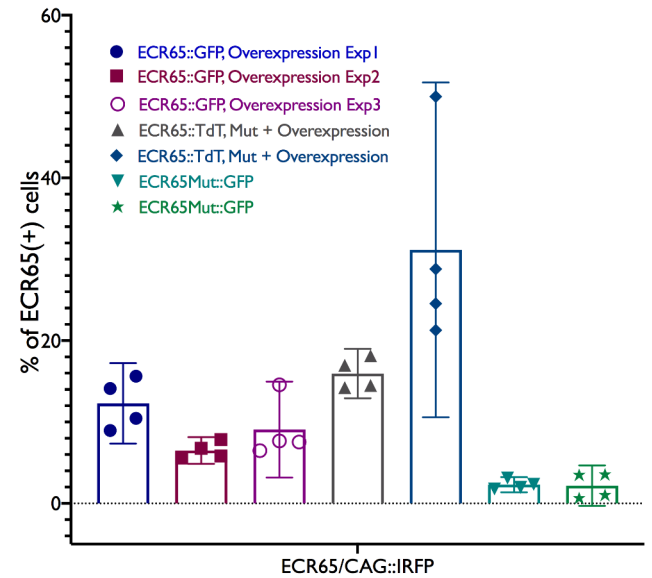**C**

Unscaled (raw) values of ECR9 control conditions

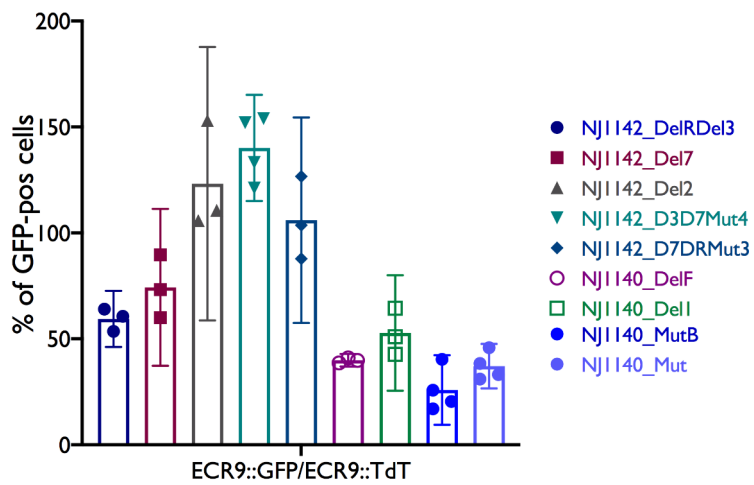**D**

Unscaled (raw) values of ECR9 control conditions

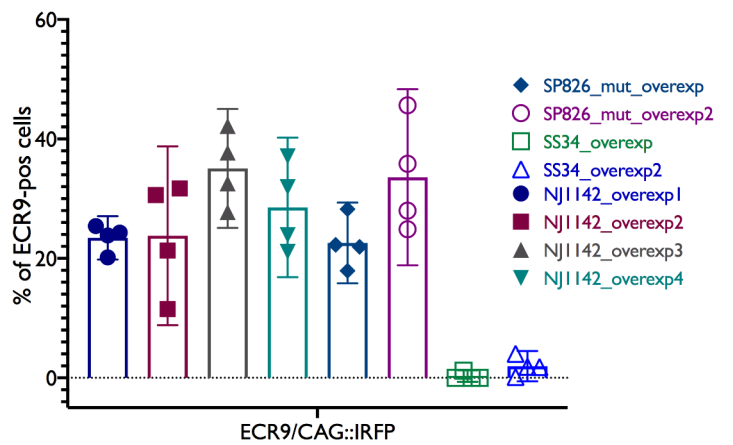**E**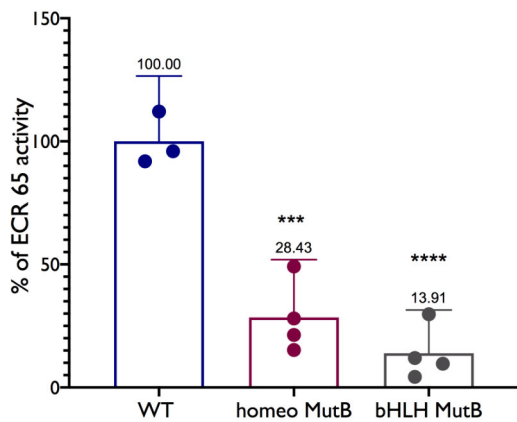**F**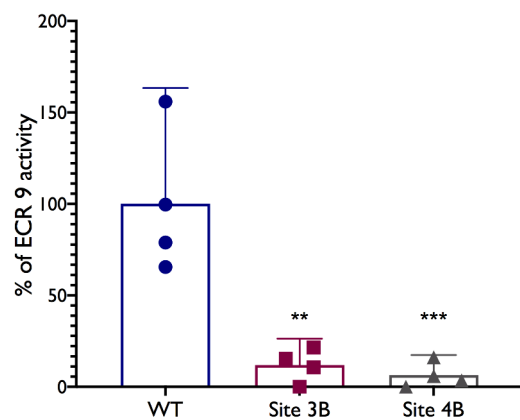

Supplement: 13064_2020_142_MOESM8_ESM.pdf [file 13064_2020_142_MOESM8_ESM.pdf]
