# Supplementary material for: Cis-regulatory analysis of Onecut1 expression in fate-restricted retinal progenitor cells
Source: PubMed Central journal article supplement (PMC7082998; doi:10.1186/s13064-020-00142-w), 2020-03-19

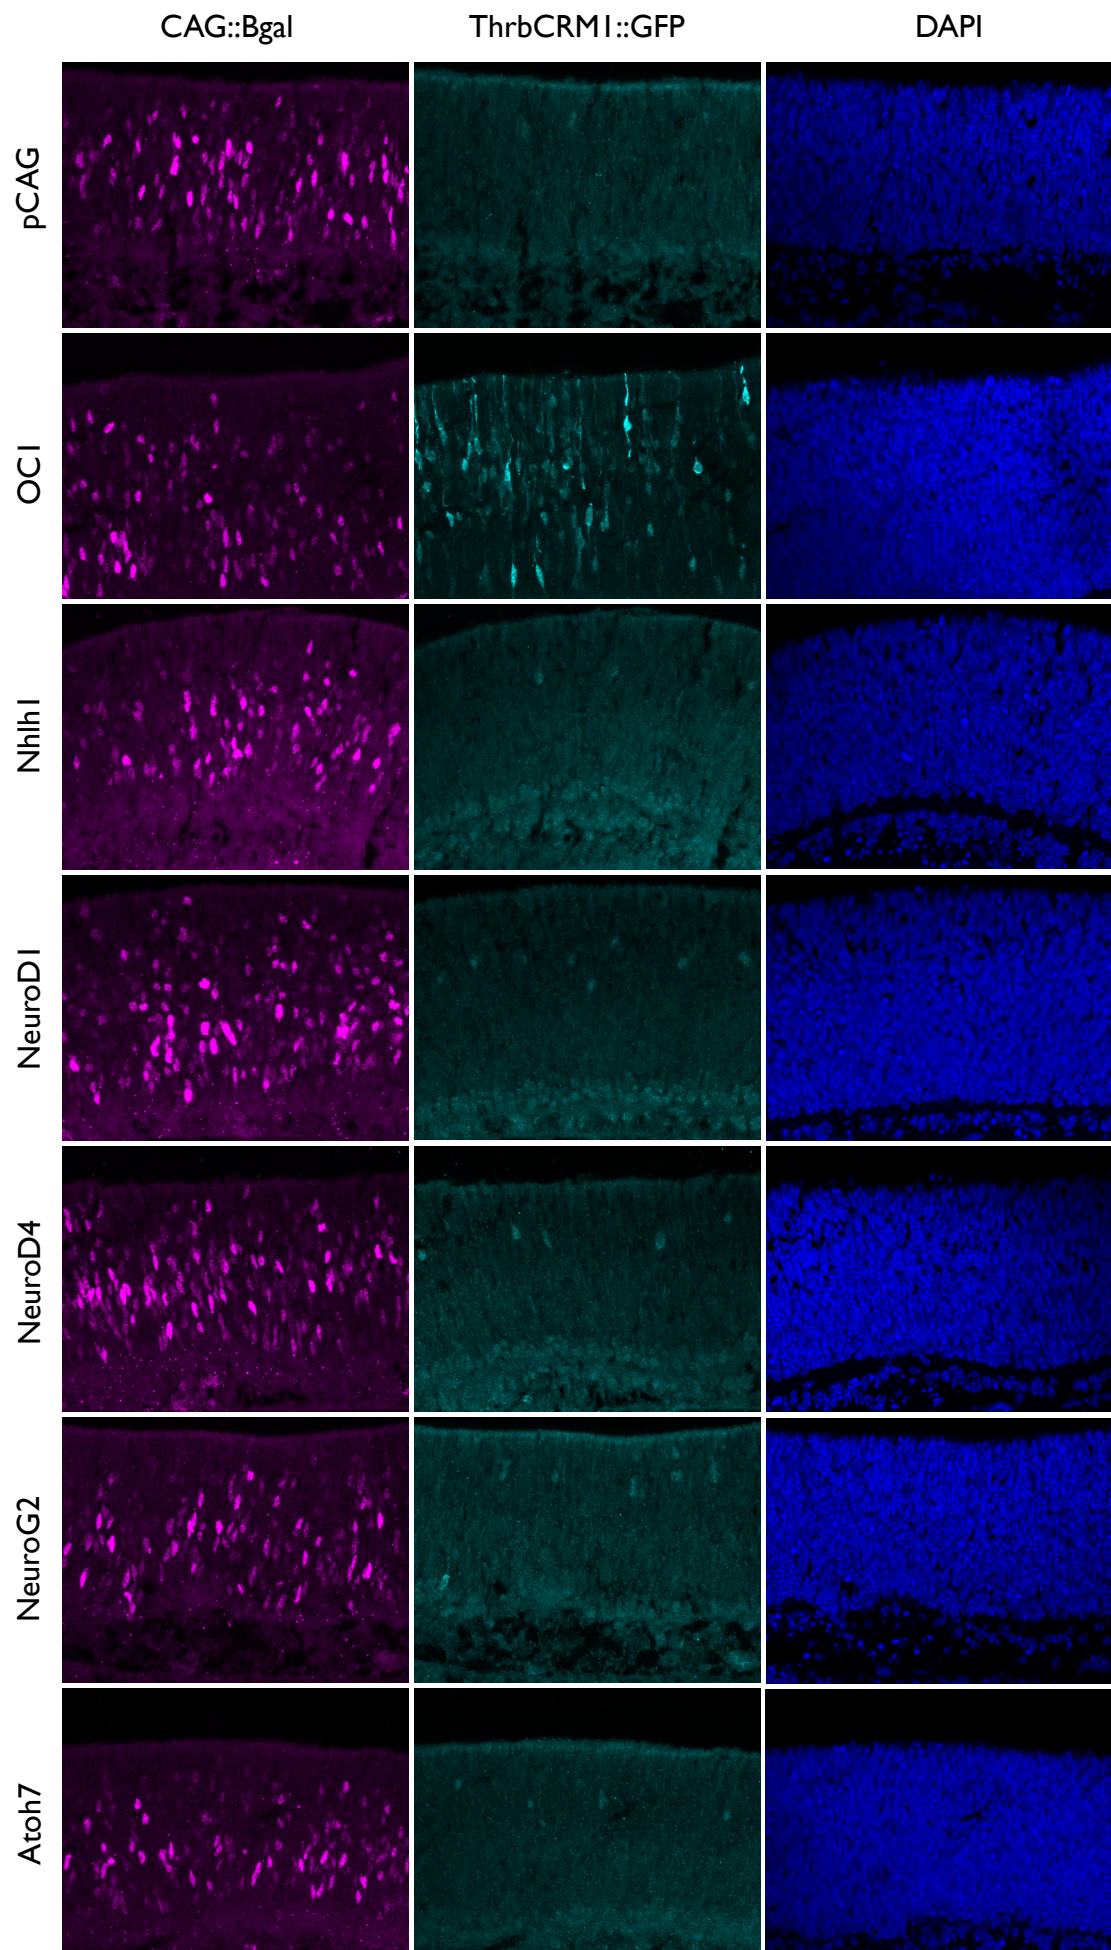

Supplement: 13064_2020_142_MOESM9_ESM.pdf [file 13064_2020_142_MOESM9_ESM.pdf]
